# Supplementary material for: The Gac-Rsm and SadB Signal Transduction Pathways Converge on AlgU to Downregulate Motility in Pseudomonas fluorescens
Source: PubMed Central journal article supplement (PMC3282751; doi:10.1371/journal.pone.0031765), 2012-02-20
Supplement: pone.0031765.s001.pdf [file pone.0031765.s001.pdf]

**Table S1. Strains and plasmids used**

| <b>Strain or plasmid</b>                          | <b>Description</b>                                                                                        | <b>Reference or source</b> |
|---------------------------------------------------|-----------------------------------------------------------------------------------------------------------|----------------------------|
| <b>Strains</b>                                    |                                                                                                           |                            |
| <i>E. coli</i>                                    |                                                                                                           |                            |
| DH5 $\alpha$                                      | <i>E. coli</i> cloning strain                                                                             | Gibco-BRL                  |
| <i>P. fluorescens</i>                             |                                                                                                           |                            |
| F113                                              | <i>P. fluorescens</i> F113 wild-type, Rif <sup>R</sup>                                                    | [63]                       |
| <i>vfr</i> <sup>-</sup>                           | F113 <i>vfr</i> <sup>-</sup> , Rif <sup>R</sup> Km <sup>R</sup>                                           | This study                 |
| <i>gacA</i> <sup>-</sup>                          | F113 <i>gacA</i> <sup>-</sup> , Rif <sup>R</sup> Km <sup>R</sup>                                          | [32]                       |
| <i>gacS</i> <sup>-</sup>                          | F113 <i>gacS</i> <sup>-</sup> , Rif <sup>R</sup> Km <sup>R</sup>                                          | [32]                       |
| <i>sadB</i> <sup>-</sup>                          | F113 <i>sadB</i> <sup>-</sup> , Rif <sup>R</sup> Km <sup>R</sup>                                          | [33]                       |
| <i>algU</i> <sup>-</sup>                          | F113 <i>algU</i> <sup>-</sup> , Rif <sup>R</sup> Km <sup>R</sup>                                          | This study                 |
| <i>amrZ</i> <sup>-</sup>                          | F113 <i>amrZ</i> <sup>-</sup> , Rif <sup>R</sup> Km <sup>R</sup>                                          | This study                 |
| <i>algU</i> <sup>-</sup> <i>amrZ</i> <sup>-</sup> | F113 <i>algU</i> <sup>-</sup> <i>amrZ</i> <sup>-</sup> , Rif <sup>R</sup> Km <sup>R</sup> Gm <sup>R</sup> | This study                 |
| <i>gacS</i> <sup>-</sup> <i>amrZ</i> <sup>-</sup> | F113 <i>gacS</i> <sup>-</sup> <i>amrZ</i> <sup>-</sup> , Rif <sup>R</sup> Km <sup>R</sup> Gm <sup>R</sup> | This study                 |
| <i>algU</i> <sup>-</sup> <i>sadB</i> <sup>-</sup> | F113 <i>algU</i> <sup>-</sup> <i>sadB</i> <sup>-</sup> , Rif <sup>R</sup> Km <sup>R</sup> Gm <sup>R</sup> | This study                 |
| <i>amrZ</i> <sup>-</sup> <i>sadB</i> <sup>-</sup> | F113 <i>amrZ</i> <sup>-</sup> <i>sadB</i> <sup>-</sup> , Rif <sup>R</sup> Km <sup>R</sup> Gm <sup>R</sup> | This study                 |
| <i>gacS</i> <sup>-</sup> <i>sadB</i> <sup>-</sup> | F113 <i>gacS</i> <sup>-</sup> <i>sadB</i> <sup>-</sup> , Rif <sup>R</sup> Km <sup>R</sup> Gm <sup>R</sup> | [33]                       |
| <b>Plasmids</b>                                   |                                                                                                           |                            |
| pVIK107                                           | Suicide vector, Km <sup>R</sup>                                                                           | [64]                       |
| pK19 <i>mobsacB</i>                               | pUC18 derivative <i>lacZ</i> <i>mob</i> site <i>sacB</i> , Km <sup>R</sup>                                | [65]                       |
| pG18 <i>mob2</i>                                  | Suicide vector, Gm <sup>R</sup>                                                                           | [66]                       |
| pVLT31                                            | IPTG-inducible expression vector, Tet <sup>R</sup>                                                        | [67]                       |
| pRK600                                            | Helper plasmid, Cm <sup>R</sup>                                                                           | [68]                       |
| pBG1529                                           | <i>vfr</i> fragment in pVIK107, Km <sup>R</sup>                                                           | This study                 |
| pBG1748                                           | pVLT31 derivative containing the <i>rsmA</i> gene ( <i>prsmA</i> ), Tet <sup>R</sup>                      | This study                 |
| pBG1749                                           | pVLT31 derivative containing the <i>rsmE</i> gene ( <i>prsmE</i> ), Tet <sup>R</sup>                      | This study                 |
| pBG1950                                           | pVLT31 derivative containing the <i>rsmI</i> gene ( <i>prsmI</i> ), Tet <sup>R</sup>                      | This study                 |
| pBG1948                                           | pVLT31 derivative containing the <i>rsmX</i> sRNA ( <i>prsmX</i> ), Tet <sup>R</sup>                      | This study                 |
| pBG1949                                           | pVLT31 derivative containing the <i>rsmY</i> sRNA ( <i>prsmY</i> ), Tet <sup>R</sup>                      | This study                 |
| pBG1772                                           | pVLT31 derivative containing the <i>rsmZ</i> sRNA ( <i>prsmZ</i> ), Tet <sup>R</sup>                      | This study                 |
| pBG1759                                           | pVLT31 derivative containing the <i>amrZ</i> gene ( <i>pamrZ</i> ), Tet <sup>R</sup>                      | This study                 |
| pBG1840                                           | pVLT31 derivative containing the <i>rsmA</i> -HA fusion, Tet <sup>R</sup>                                 | This study                 |
