# Supplementary material for: The Gac-Rsm and SadB Signal Transduction Pathways Converge on AlgU to Downregulate Motility in Pseudomonas fluorescens
Source: PubMed Central journal article supplement (PMC3282751; doi:10.1371/journal.pone.0031765), 2012-02-20
Supplement: pone.0031765.s002.pdf [file pone.0031765.s002.pdf]

1 **Table S2. Primers used**

2

| <b>Primer</b> | <b>Sequence5'→3'<sup>a</sup></b>                                  | <b>Purpose</b>                                                  |
|---------------|-------------------------------------------------------------------|-----------------------------------------------------------------|
| vfrF          | ATGGTTGGTATTACCCCA                                                | To generate mutant                                              |
| vfrR          | GGCATCGGGTTGCTTGCA                                                | To generate mutant                                              |
| amrZF         | GGGAACGCATTGCCGAAGTG                                              | To generate mutant                                              |
| amrZR         | GCGTCATGGGCAATCAGCGAA                                             | To generate mutant                                              |
| algUF         | TGCACGACACCCATGAAG                                                | To generate mutant                                              |
| algUR         | GTCGACAAATCTTCGGGCA                                               | To generate mutant                                              |
| rsmAextF      | ATGCTGATTCTGACTCGTC                                               | To amplify complete gene                                        |
| rsmAextR      | TTAATGGCTTGGTTCTTCGT                                              | To amplify complete gene                                        |
| HArsmAR       | TCCTGCAGTTAAGCATAATCTGGA<br><u>ACATCGTATGGATAATGGCTTGGTTCGTCG</u> | To generate HA-tagged RsmA                                      |
| rsmEextF      | ATGCTGATACTCACCCGCAA                                              | To amplify complete gene                                        |
| rsmEextR      | TCAGGGCGTTTGTGGCTTG                                               | To amplify complete gene                                        |
| rsmIextF      | CGGGTGTCTTGAGAACAGGAA                                             | To amplify complete gene                                        |
| rsmIextR      | AAGCACGACGTACCCAAGCA                                              | To amplify complete gene                                        |
| rsmXextF      | AGATGGTAGCTATGTCGTC                                               | To amplify complete gene                                        |
| rsmXextR      | AGCAGCAACGGCGTGTAAG                                               | To amplify complete gene                                        |
| rsmYextF      | ACACATCGTGCTGGCGATT                                               | To amplify complete gene                                        |
| rsmYextR      | GAAACGCAACCAGAAGCAGC                                              | To amplify complete gene                                        |
| amrZextF      | ATGCGCCCATTGAAACAGG                                               | To amplify complete gene                                        |
| amrZextR      | TCAGGTCGCGTCTGCGG                                                 | To amplify complete gene                                        |
| rsmZextF      | TAGCGTTACAGAGCAAGCCA                                              | To amplify complete gene                                        |
| rsmZextR      | TTCGGATCAAGAAATCGCAG                                              | To amplify complete gene                                        |
| fleQF         | GGCACCAGCCGGGCGAT                                                 | For <i>fleQ</i> expression                                      |
| fleQR         | TGACCTGCATCGGCAGCG                                                | For <i>fleQ</i> expression                                      |
| qfleQF        | TGCTGATCCTGGGTGAGTC                                               | For <i>fleQ</i> expression (qPCR)                               |
| qfleQR        | ACTCGCTCTCCAGCAACTC                                               | For <i>fleQ</i> expression (qPCR)                               |
| fliCF         | AACTCCAGCCGTGCTGA                                                 | For <i>fliC</i> expression                                      |
| fliCR         | GCAGCTGGTTGGCCTGG                                                 | For <i>fliC</i> expression                                      |
| qfliCF        | TTCCGATGCTCTGTCCACTTC                                             | For <i>fliC</i> expression (qPCR) and RNA-IP                    |
| qfliCR        | GATACCGTCGTTGGCGTTCTT                                             | For <i>fliC</i> expression (qPCR) and RNA-IP                    |
| 16SF          | TCAGTCACACTGGAAGTGG                                               | For <i>16S</i> expression                                       |
| 16SR          | CAGGCGGTCAACTTAATGCG                                              | For <i>16S</i> expression                                       |
| qamrZF        | ATGCGCCCATTGAAACAGG                                               | For <i>amrZ</i> expression (qPCR)                               |
| qamrZR        | GAGAGTTGTCGGAAGCGTTGA                                             | For <i>amrZ</i> expression (qPCR)                               |
| qalgUF        | GCAGGATGTCGCTCAGGAAG                                              | For <i>algU</i> expression (qPCR), RNA-IP and intergenic RT-PCR |
| qalgUR        | AGTTTTTCGCCGTGTTGATGG                                             | For <i>algU</i> expression (qPCR) and RNA-IP                    |
| qmucAF        | GACAACGAAGCGGACGAAC                                               | For RNA-IP and intergenic RT-PCR                                |

|         |                       |                                     |
|---------|-----------------------|-------------------------------------|
| qmucAR  | AGGCGTGGAAGCAACAAGTC  | For RNA-IP and<br>intergenic RT-PCR |
| qmucBF  | TATTCACGCTTCTGCTTGGTG | For RNA-IP                          |
| qmucBR  | CTCTGCTGTTGCTCGGCTTGT | For RNA-IP and<br>intergenic RT-PCR |
| qmucBF2 | ACGGTGGTCGGTGAGATTCCT | For intergenic RT-PCR               |
| qmucDF  | CCTGATTTACGCAACTGGTC  | For RNA-IP                          |
| qmucDR  | GCATCTGCTGGTCCGATACAC | For RNA-IP and<br>intergenic RT-PCR |
| qhcnAF  | TTCAGACCTTCTACGCCGAAA | For RNA-IP                          |
| qhcnAR  | GGACTGGATGACGGTGAGGA  | For RNA-IP                          |

1 <sup>a</sup>HA sequence is underlined for HArsmAR primer

2
